# Supplementary material for: Gender-transformative programming with men and boys to improve sexual and reproductive health and rights: a systematic review of intervention studies
Source: PubMed Central journal article supplement — BMJ Glob Health. 2020 Oct 13;5(10):e002997. doi: 10.1136/bmjgh-2020-002997 (PMC7554509; doi:10.1136/bmjgh-2020-002997), 2020-10-13
Supplement: bmjgh-2020-002997supp001.pdf [file bmjgh-2020-002997supp001.pdf]

# Supplemental Material

## Supplement 1

### *Search Strategy for Stage 1 Evidence and Gap Map and Review of Reviews*

Ruane-McAteer E, Hanratty J, Lynn F, Reid E, Khosla R, Amin A, et al. Protocol for a systematic review: Interventions addressing men, masculinities and gender equality in sexual and reproductive health: An evidence and gap map and systematic review of reviews. *Campbell Syst Rev* [Internet]. 2018 Jan 31;14(1):1–24. Available from:

<https://onlinelibrary.wiley.com/doi/abs/10.1002/CL2.203>

### *Search Terms*

1 AND 2 AND 3 AND 4 (limited to Human; 2007-present)

| #1<br>SRHR                                                                                                                                                                                                                                                                                                                                                                                                                                                                                                                                                                                                                                                                                                                                                                                                                                                                                                                                                                        | #2<br>Males/Masculinities                                                                | #3<br>Systematic Review                                                                                                                                                                                                                                                                                                                                                                                                                                             | #4<br>Trials                                                                    |
|-----------------------------------------------------------------------------------------------------------------------------------------------------------------------------------------------------------------------------------------------------------------------------------------------------------------------------------------------------------------------------------------------------------------------------------------------------------------------------------------------------------------------------------------------------------------------------------------------------------------------------------------------------------------------------------------------------------------------------------------------------------------------------------------------------------------------------------------------------------------------------------------------------------------------------------------------------------------------------------|------------------------------------------------------------------------------------------|---------------------------------------------------------------------------------------------------------------------------------------------------------------------------------------------------------------------------------------------------------------------------------------------------------------------------------------------------------------------------------------------------------------------------------------------------------------------|---------------------------------------------------------------------------------|
| sexual health or reproductive health or maternal health or maternal welfare or maternal mortality or neonatal health or perinatal care or perinatal health or prenatal care or prenatal health or antenatal health or ante-natal health or postnatal health or post-natal health or post-part* or post part* or newborn health or family planning or contracepti* or condoms or condom or pregnan* or abortion or induced abortion or abort* or birth or miscarriage or spontaneous abortion or stillb* or Minimum Initial Service Package or obstetric* or gynecology or gynaecology or safe motherhood or safe delivery or skilled birth attend* or sexually transmitted infection* or sexually transmitted disease* or HIV or Human immunodeficiency virus or AIDS or acquired immune deficiency syndrome or PMTCT or rectovaginal fistula or urethra fistula or urinary tract fistula or genital trauma or genital injury or vaginal trauma or vaginal injury or gender-based | men or man or male or males or boy or boys or masculin* or father* or gender or equality | "data synthesis" or "evidence synthesis" or metasynthesis or meta-synthesis or "narrative synthesis" or "quantitative synthesis" or "research synthesis" or "synthesis of evidence" or "thematic synthesis" or metaanaly* or meta-analy* or metaanalysis or meta-analysis or systematic or "systematic map*" or "systematic overview*" or "systematic review*" or "systematically review*" or "bibliographic search" or "database search" or "electronic search" or | random* or trial or placebo or group or groups or intervention or interventions |

|                                                                                                                                                                                                                                                                                                                                                                                                                                                                                                                                                                                                                                                                                                                                                          |  |                                                                                                                                                                                                                                                                                                                                                                                                                               |  |
|----------------------------------------------------------------------------------------------------------------------------------------------------------------------------------------------------------------------------------------------------------------------------------------------------------------------------------------------------------------------------------------------------------------------------------------------------------------------------------------------------------------------------------------------------------------------------------------------------------------------------------------------------------------------------------------------------------------------------------------------------------|--|-------------------------------------------------------------------------------------------------------------------------------------------------------------------------------------------------------------------------------------------------------------------------------------------------------------------------------------------------------------------------------------------------------------------------------|--|
| <p>violence or gender based violence or partner violence or family violence or violence against women or domestic violence or sexual abuse or sex crime or sexual crime or domestic violence or sexual violence or rape or intimate partner violence or partner violence or partner abuse or sexual assault or sexual harassment or sexual coercion or forced sex or sexual slavery or sexual exploitation or coercive control or child prostitut* or child trafficking or trafficking of child* or female genital mutilation or FGM or female genital cutting or FGMC or female circumcis* or fertile* or infertil* or (early and marriage) or (child and marriage) or (forced and marriage) or (arranged and marriage) or (abduction and marriage)</p> |  | <p>handsearch* or "hand search*" or "keyword search" or "literature search" or "search term*" or "article reviews" or "literature review" or "overview of reviews" or "review literature" or "reviewed the literature" or "reviews studies" or "this review" or "scoping stud*" or "overview study" or "overview of the literature" or meta-ethnograph* or meta-epidemiological or "data extraction" or "meta-regression"</p> |  |
|----------------------------------------------------------------------------------------------------------------------------------------------------------------------------------------------------------------------------------------------------------------------------------------------------------------------------------------------------------------------------------------------------------------------------------------------------------------------------------------------------------------------------------------------------------------------------------------------------------------------------------------------------------------------------------------------------------------------------------------------------------|--|-------------------------------------------------------------------------------------------------------------------------------------------------------------------------------------------------------------------------------------------------------------------------------------------------------------------------------------------------------------------------------------------------------------------------------|--|

### Information Sources

Peer-reviewed literature: CINAHL; Medline; PsycINFO; Social Science Citation Index–expanded; Cochrane Library; Campbell Collaboration; Embase; Global Health Library and Scopus

Grey literature: A google search of the grey literature was conducted using a condensed list of terms. The bibliographies of all identified gender transformative reviews were also searched for any additional reviews.
