# Supplementary material for: Gender-transformative programming with men and boys to improve sexual and reproductive health and rights: a systematic review of intervention studies
Source: PubMed Central journal article supplement — BMJ Glob Health. 2020 Oct 13;5(10):e002997. doi: 10.1136/bmjgh-2020-002997 (PMC7554509; doi:10.1136/bmjgh-2020-002997), 2020-10-13
Supplement: bmjgh-2020-002997supp002.pdf [file bmjgh-2020-002997supp002.pdf]

## Supplement 2

### *References of Included Studies in Systematic Review of Intervention Studies*

1. Abramsky T, Devries KM, Michau L, et al. The impact of SASA!, a community mobilisation intervention, on women's experiences of intimate partner violence: secondary findings from a cluster randomised trial in Kampala, Uganda. *J Epidemiol Community Health*. 2016;70(8):818-825. doi:10.1136/jech-2015-206665
2. Abramsky T, Devries K, Kiss L, et al. Findings from the SASA! Study: a cluster randomized controlled trial to assess the impact of a community mobilization intervention to prevent violence against women and reduce HIV risk in Kampala, Uganda. *BMC Med*. 2014;12(1):122. doi:10.1186/s12916-014-0122-5
3. Achyut P, Bhatia N, Singh AK, et al. Building Support for Gender Equality among Young Adolescents in School: Findings from Mumbai India. Washington, DC: International Center for Research on Women; 2011.
4. Ara J, Das NC. Impact Assessment of Adolescent Development Programme in the Selective Border Regions of Bangladesh. Bangladesh; 2010. www.brac.net/research.
5. Ashburn K, Kerner B, Ojamuge D, Lundgren R. Evaluation of the Responsible, Engaged, and Loving (REAL) Fathers Initiative on Physical Child Punishment and Intimate Partner Violence in Northern Uganda. *Prev Sci*. 2017;18(7):854-864. doi:10.1007/s1121-016-0713-9
6. Avery-leaf S, Cascardi M, O'leary KD, Cano A. Efficacy of a dating violence prevention program on attitudes justifying aggression. *J Adolesc Heal*. 1997;21(1):11-17. doi:10.1016/S1054-139X(96)00309-6
7. Baiocchi M, Omondi B, Langat N, et al. A Behavior-Based Intervention That Prevents Sexual Assault: the Results of a Matched-Pairs, Cluster-Randomized Study in Nairobi, Kenya. *Prev Sci*. 2017;18(7):818-827. doi:10.1007/s1121-016-0701-0
8. Bartel D, Simon C, Barnes B. Meeting Challenges, Seeding Change Integrating Gender and Sexuality into Maternal and Newborn Health Programming through the Inner Spaces, Outer Faces Initiative (ISOFI). New Delhi, India; 2010.
9. CARE International. The Young Men Initiative-A Case Study 2012 Engaging Young Men in the Western Balkans in Gender Equality and Violence Prevention.; 2012. www.youngmeninitiative.org.
10. Chamroonsawasdi K. Gender roles, physical and sexual violence prevention in primary extend to secondary school in Samutsakorn Province, Thailand Predictive factors of antiretroviral (ARV) drug adherence among people living with HIV/AIDS attending at Taksin Hospital, Bangkok. *J Med Assoc Thai*. 2010;93(3):358-365. http://www.mat.or.th/journal.
11. Chege J, Igras S, Askew I, Mutesh JK. Testing the Effectiveness of Integrating Community-Based Approaches for Encouraging Abandonment of Female Genital Cutting into CARE's Reproductive Health Programs in Ethiopia and Kenya FRONTIERS in Reproductive Health CARE International. Washington, DC; 2004.
12. Cowan FM, Pascoe SJS, Langhaug LF, et al. The Regai Dzive Shiri project: Results of a randomized trial of an HIV prevention intervention for youth. *AIDS*. 2010;24(16):2541-2552. doi:10.1097/QAD.0b013e32833e77c9

13. Daniel EE, Masilamani R, Rahman M. The Effect of Community-Based Reproductive Health Communication Interventions on Contraceptive Use Among Young Married Couples in Bihar, India. *Int Perspect Sex Reprod Health*. 2008;34(4):189-197. doi:10.1363/iffpp.34.189.08
14. Das M, Ghosh S, Miller E, O'Conner B, Verma R. *Engaging Coaches and Athletes in Fostering Gender Equity: Findings from the Parivartan Program in Mumbai, India*. New Delhi, India; 2012. [http://www.icrw.org/files/publications/Parivartan Engaging Coaches and Athletes in Fostering Gender Equity.pdf](http://www.icrw.org/files/publications/Parivartan%20Engaging%20Coaches%20and%20Athletes%20in%20Fostering%20Gender%20Equity.pdf).
15. Davis RC, Taylor BG, Maxwell CD. *Does Batterer Treatment Reduce Violence? A Randomized Experiment in Brooklyn*. Washington, DC; 2000.
16. Davis TL, Liddell DL. Getting inside the house: The effectiveness of a rape prevention program for college fraternity men. *J Coll Stud Dev*. 2002;43(1):35.
17. Diop NJ, Faye M, Moreau A, et al. *The TOSTAN Program Evaluation of a Community Based Education Program in Senegal*. Washington, DC; 2004.
18. El-Bassel N, Witte SS, Gilbert L, et al. Long-Term Effects of an HIV/STI Sexual Risk Reduction Intervention for Heterosexual Couples. *AIDS Behav*. 2005;9(1):1-13. doi:10.1007/s10461-005-1677-0
19. Erulkar A, Apicella L, Ferede A. Addis Birhan project: Working with boys and men to address young girls' social vulnerability. *Promoting Healthy, Safe, and Productive Transitions to Adulthood*. 2011.
20. Exner TM, Mantell JE, Adeokun LA, et al. Mobilizing men as partners: the results of an intervention to increase dual protection among Nigerian men. *Health Educ Res*. 2009;24(5):846-854. doi:10.1093/her/cyp021
21. Fay KE, Medway FJ. An acquaintance rape education program for students transitioning to high school. *Sex Educ*. 2006;6(3):223-236. doi:10.1080/14681810600836414
22. Feder L, Dugan L. *Testing a Court-Mandated Treatment Program for Domestic Violence Offenders: The Broward Experiment*. Washington, DC; 2004.
23. Feder L, Dugan L. A test of the efficacy of court-mandated counseling for domestic violence offenders: The Broward Experiment. *Justice Q*. 2002;19(2):343-375. doi:10.1080/07418820200095271
24. Feder L, Forde DR. *Test of the Efficacy of Court-Mandated Counseling for Domestic Violence Offenders: The Broward Experiment*. Washington, DC; 2000.
25. Foshee VA, Bauman KE, Arriaga XB, Helms RW, Koch GG, Linder GF. An evaluation of Safe Dates, an adolescent dating violence prevention program. *Am J Public Health*. 1998;88(1):45-50.
26. Foshee VA, Bauman KE, Greene WF, Koch GG, Linder GF, MacDougall JE. The Safe Dates program: 1-year follow-up results. *Am J Public Health*. 2000;90(10):1619-1622. doi:10.2105/AJPH.90.10.1619
27. Foshee VA, Bauman KE, Ennett ST, Linder GF, Benefield T, Suchindran C. Assessing the Long-Term Effects of the Safe Dates Program and a Booster in Preventing and Reducing Adolescent Dating Violence Victimization and Perpetration. *Am J Public Health*. 2004;94(4):619-624. doi:10.2105/AJPH.94.4.619

28. Foshee VA, Bauman KE, Ennett ST, Suchindran C, Benefield T, Linder GF. Assessing the Effects of the Dating Violence Prevention Program “Safe Dates” Using Random Coefficient Regression Modeling. *Prev Sci.* 2005;6(3):245-258. doi:10.1007/s1121-005-0007-0
29. Foubert JD, Marriott KA. Effects of a sexual assault peer education program on men’s belief in rape myths. *Sex Roles.* 1997;36(3-4):259-268. doi:10.1007/BF02766271
30. Gidycz CA, Orchowski LM, Berkowitz AD. Preventing Sexual Aggression Among College Men: An Evaluation of a Social Norms and Bystander Intervention Program. *Violence Against Women.* 2011;17(6):720-742. doi:10.1177/1077801211409727
31. Gordon JA, Moriarty LJ. The Effects Of Domestic Violence Batterer Treatment On Domestic Violence Recidivism. *Crim Justice Behav.* 2003;30(1):118-134. doi:10.1177/0093854802239166
32. Gupta J, Falb KL, Lehmann H, et al. Gender norms and economic empowerment intervention to reduce intimate partner violence against women in rural Côte d’Ivoire: a randomized controlled pilot study. *BMC Int Health Hum Rights.* 2013;13(1):46. doi:10.1186/1472-698X-13-46
33. Harrell A. Evaluation of Court-Ordered Treatment for Domestic Violence Offenders. Washington, DC; 1991.
34. Hillenbrand-Gunn TL, Heppner MJ, Mauch PA, Park H-J. Men as Allies: The Efficacy of a High School Rape Prevention Intervention. *J Couns Dev.* 2010;88(1):43-51. doi:10.1002/j.1556-6678.2010.tb00149.x
35. Hossain J, Ross SR. The effect of addressing demand for as well as supply of emergency obstetric care in Dinajpur, Bangladesh. *Int J Gynecol Obstet.* 2006;92(3):320-328. doi:10.1016/j.ijgo.2005.09.029
36. Instituto Promundo. Engaging men to Prevent Gender-Based Violence: A Multi-Country Intervention and Impact Evaluation Study. Report for the UN Trust Fund. 2012.
37. James S, Reddy P, Ruiters RAC, McCauley A, Borne B van den. The Impact of an HIV and AIDS Life Skills Program on Secondary School Students in KwaZulu-Natal, South Africa. *AIDS Educ Prev.* 2006;18(4):281-294. doi:10.1521/aeap.2006.18.4.281
38. Jewkes R, Nduna M, Levin J, et al. Impact of Stepping Stones on incidence of HIV and HSV-2 and sexual behaviour in rural South Africa: cluster randomised controlled trial. *BMJ.* 2008;337(aug07 1):a506-a506. doi:10.1136/bmj.a506
39. Jewkes R, Wood K, Duvvury N. “I woke up after I joined Stepping Stones”: meanings of an HIV behavioural intervention in rural South African young people’s lives. *Health Educ Res.* 2010;25(6):1074-1084. doi:10.1093/her/cyq062
40. Kalichman SC, Simbayi LC, Cloete A, et al. Integrated Gender-Based Violence and HIV Risk Reduction Intervention for South African Men: Results of a Quasi-Experimental Field Trial. *Prev Sci.* 2009;10(3):260-269. doi:10.1007/s1121-009-0129-x
41. Keller J, Mboya BO, Sinclair J, et al. A 6-Week School Curriculum Improves Boys’ Attitudes and Behaviors Related to Gender-Based Violence in Kenya. *J Interpers Violence.* 2017;32(4):535-557. doi:10.1177/0886260515586367

42. Kyegombe N, Abramsky T, Devries KM, et al. What is the potential for interventions designed to prevent violence against women to reduce children's exposure to violence? Findings from the SASA! study, Kampala, Uganda. *Child Abuse Negl.* 2015;50:128-140. doi:10.1016/j.chiabu.2015.10.003
43. Kyegombe N, Abramsky T, Devries KM, et al. The impact of SASA!, a community mobilization intervention, on reported HIV-related risk behaviours and relationship dynamics in Kampala, Uganda. *J Int AIDS Soc.* 2014;17(1):19232. doi:10.7448/IAS.17.1.19232
44. Labriola M, Rempel M, Davis RC. *Testing the Effectiveness of Batterer Programs and Judicial Monitoring.* Washington, DC: National Institute of Justice; 2005.
45. Lin S-C, Su C-Y, Chou FH-C, et al. Domestic violence recidivism in high-risk Taiwanese offenders after the completion of violence treatment programs. *J Forens Psychiatry Psychol.* 2009;20(3):458-472. doi:10.1080/14789940802638341
46. Lundgren R, Beckman M, Chaurasiya SP, Subhedi B, Kerner B. Whose turn to do the dishes? Transforming gender attitudes and behaviours among very young adolescents in Nepal. *Gen Dev.* 2013;21(1):127-145. doi:10.1080/13552074.2013.767520
47. Macgowan MJ. An evaluation of a dating violence prevention program for middle school students. *Violence Vict.* 1997;12(3):223.
48. Martín AF, Baz MBO, Vicario-Molina I, Álvarez JLM, Fuertes AF, González RJC. Assessment of a Sexual Coercion Prevention Program for Adolescents. *Span J Psychol.* 2012;15(2):560-570. doi:10.5209/rev\_SJOP.2012.v15.n2.38867
49. Martín AF, Baz MBO, Vicario-Molina I, Álvarez JLM, Fuertes AF, González RJC. Assessment of a Sexual Coercion Prevention Program for Adolescents. *Span J Psychol.* 2012;15(2):560-570. doi:10.5209/rev\_SJOP.2012.v15.n2.38867
50. Maxwell CD, Davis RC, Taylor BG. *Results From the Brooklyn Domestic Violence Treatment Experiment.* Washington, DC; 2004.
51. Miller E, Das M, Tancredi DJ, et al. Evaluation of a Gender-Based Violence Prevention Program for Student Athletes in Mumbai, India. *J Interpers Violence.* 2014;29(4):758-778. doi:10.1177/0886260513505205
52. Miller E, Tancredi DJ, McCauley HL, et al. "Coaching Boys into Men": A Cluster-Randomized Controlled Trial of a Dating Violence Prevention Program. *J Adolesc Heal.* 2012;51(5):431-438. doi:10.1016/j.jadohealth.2012.01.018
53. Pulerwitz J, Barker G, Segundo M, Nascimento M. *Promoting More Gender-Equitable Norms and Behaviors Among Young Men as an HIV/AIDS Prevention Strategy.* Washington, DC; 2006.
54. Pulerwitz J, Hughes L, Mehta M, Kidanu A, Verani F, Tewolde S. *Changing Gender Norms and Reducing Intimate Partner Violence: Results From a Quasi-Experimental Intervention Study With Young Men in Ethiopia.* *Am J Public Health.* 2015;105(1):132-137. doi:10.2105/AJPH.2014.302214
55. Pulerwitz J, Martin S, Mehta M, et al. *Promoting Gender Equity for HIV and Violence Prevention: Results From the PEPFAR Male Norms Initiative Evaluation in Ethiopia.* Washington, DC; 2010.

56. Rhodes SD, McCoy TP, Vissman AT, et al. A Randomized Controlled Trial of a Culturally Congruent Intervention to Increase Condom Use and HIV Testing Among Heterosexually Active Immigrant Latino Men. *AIDS Behav.* 2011;15(8):1764-1775. doi:10.1007/s10461-011-9903-4
57. Salazar LF, Cook SL. Preliminary Findings from an Outcome Evaluation of an Intimate Partner Violence Prevention Program for Adjudicated, African American, Adolescent Males. *Youth Violence Juv Justice.* 2006;4(4):368-385. doi:10.1177/1541204006292818
58. Salazar LF, Vivolo-Kantor A, Hardin J, Berkowitz A. A Web-Based Sexual Violence Bystander Intervention for Male College Students: Randomized Controlled Trial. *J Med Internet Res.* 2014;16(9):e203. doi:10.2196/jmir.3426
59. Saunders DG. Feminist-Cognitive-Behavioral and Process-Psychodynamic Treatments for Men Who Batter: Interaction of Abuser Traits and Treatment Models. *Violence Vict.* 1996;11(4):393-414. doi:10.1891/0886-6708.11.4.393
60. Schuler SR, Nanda G, Chen M, Rodriguez LFR, Lenzi R. Interactive Workshops to Promote Gender Equity And Family Planning In Rural Communities of Tanzania: Results of a Field Test. Washington, DC; 2012.
61. Schuler SR, Ramirez L. Interactive Workshops to Promote Gender Equity and Family Planning in Rural Guatemalan Communities: Results of a Field Test. Washington, DC; 2012.
62. Schwartz JP, Magee MM, Griffin LD, Dupuis CW. Effects of a Group Preventive Intervention on Risk and Protective Factors Related to Dating Violence. *Gr Dyn Theory, Res Pract.* 2004;8(3):221-231. doi:10.1037/1089-2699.8.3.221
63. Shattuck D, Kerner B, Gilles K, Hartmann M, Ng'ombe T, Guest G. Encouraging Contraceptive Uptake by Motivating Men to Communicate About Family Planning: The Malawi Male Motivator Project. *Am J Public Health.* 2011;101(6):1089-1095. doi:10.2105/AJPH.2010.300091
64. Taylor BG, Davis RC, Maxwell CD. The effects of a group batterer treatment program: A randomized experiment in Brooklyn. *Justice Q.* 2001;18(1):171-201. doi:10.1080/07418820100094861
65. Taylor BG, Maxwell C. The Effects of a Short-Term Batterer Treatment Program for Detained Arrestees: A Randomized Experiment in the Sacramento County, California Jail. Washington, DC: Department of Justice, Crime and Prevention Center; 2009.
66. Taylor M, Jinabhai C, Dlamini S, Sathiparsad R, Eggers MS, De Vries H. Effects of a Teenage Pregnancy Prevention Program in KwaZulu-Natal, South Africa. *Health Care Women Int.* 2014;35(7-9):845-858. doi:10.1080/07399332.2014.910216
67. Verma RK, Pulerwitz J, Mahendra VS, et al. Promoting Gender Equity as a Strategy to Reduce HIV Risk and Gender-Based Violence among Young Men in India (Horizons Final Report). Washington, DC; 2008.
68. Wagman JA, Gray RH, Campbell JC, et al. Effectiveness of an integrated intimate partner violence and HIV prevention intervention in Rakai, Uganda: analysis of an intervention in an existing cluster randomised cohort. *Lancet Glob Heal.* 2015;3(1):e23-e33. doi:10.1016/S2214-109X(14)70344-4
