# Supplementary material for: Gender-transformative programming with men and boys to improve sexual and reproductive health and rights: a systematic review of intervention studies
Source: PubMed Central journal article supplement — BMJ Glob Health. 2020 Oct 13;5(10):e002997. doi: 10.1136/bmjgh-2020-002997 (PMC7554509; doi:10.1136/bmjgh-2020-002997), 2020-10-13
Supplement: bmjgh-2020-002997supp003.pdf [file bmjgh-2020-002997supp003.pdf]

## Supplement 3

### Data Extraction Form

| # | Question                                                                                                                                                                                                                                                                                                                                                                                                                                                                                                                                                                                                                                                                                                                                                                                                                                                                                                                                                                                                                                                                                                                                                                                             | Type                                                                                                                                                               |
|---|------------------------------------------------------------------------------------------------------------------------------------------------------------------------------------------------------------------------------------------------------------------------------------------------------------------------------------------------------------------------------------------------------------------------------------------------------------------------------------------------------------------------------------------------------------------------------------------------------------------------------------------------------------------------------------------------------------------------------------------------------------------------------------------------------------------------------------------------------------------------------------------------------------------------------------------------------------------------------------------------------------------------------------------------------------------------------------------------------------------------------------------------------------------------------------------------------|--------------------------------------------------------------------------------------------------------------------------------------------------------------------|
| 1 | <p><b>What area of WHO Reproductive Health Strategy does this review fall under? (Select checkbox and state area review focuses on)</b><br/> <b>[Specify what outcomes covered under domain e.g. subcategories of WHO domain – birth spacing, fertility, contraception]</b></p> <p>Helping people realise their desired family size (i.e. contraception and family planning; prevention and treatment of infertility)</p> <p>Health of pregnant women and girls and their new born infants (i.e. maternal and infant mortality; preventing complications in pregnancy, childbirth and the postnatal period)</p> <p>Preventing unsafe abortion</p> <p>Promoting Sexual Health and Wellbeing (i.e. prevention of reproductive tract and sexually transmitted infections; HIV)</p> <p>Sexual and Reproductive Health in disease outbreaks (i.e. Ebola and Zika)</p> <p>Healthy Adolescence for a Healthy Future (i.e. any of the areas covered in other domains focusing on adolescents only)</p> <p>Preventing and responding to violence against women and girls (i.e. IPV, sexual violence, sexual coercion) and harmful practices (i.e. FGM; early child forced marriage)</p> <p>None [EXCLUDE]</p> | <p>Checkbox/Text</p> <p>Checkbox/Text</p> <p>Checkbox/Text</p> <p>Checkbox/Text</p> <p>Checkbox/Text</p> <p>Checkbox/Text</p> <p>Checkbox/Text</p> <p>Checkbox</p> |
| 2 | <p><b>What type of outcomes are used?</b></p> <p>Biological (e.g. pregnancy in adolescence)</p> <p>Behavioural (e.g. child marriage rates)</p> <p>Attitudinal (e.g. self-reported attitudes to child marriage)</p> <p>Other [specify]</p>                                                                                                                                                                                                                                                                                                                                                                                                                                                                                                                                                                                                                                                                                                                                                                                                                                                                                                                                                            | <p>Checkbox</p> <p>Checkbox</p> <p>Checkbox</p> <p>Text</p>                                                                                                        |
| 3 | <b>Funder</b>                                                                                                                                                                                                                                                                                                                                                                                                                                                                                                                                                                                                                                                                                                                                                                                                                                                                                                                                                                                                                                                                                                                                                                                        | Text                                                                                                                                                               |

| #  | Question                                                                        | Type     |
|----|---------------------------------------------------------------------------------|----------|
| 4  | <b>Aim of the intervention</b>                                                  | Text     |
| 5  | <b>Intervention design</b>                                                      | Text     |
|    | Quasi-experimental (Pre- and Post-test, control group)                          | Checkbox |
|    | Randomised Controlled Trial                                                     | Checkbox |
|    | Non-experimental study [EXCLUDE]                                                | Checkbox |
| 6  | <b>Details of intervention (e.g. frequency, duration, intensity, providers)</b> | Text     |
| 7  | <b>Details of control</b>                                                       | Text     |
| 8  | <b>Details of the Gender Transformative intervention component</b>              | Text     |
| 9  | <b>Were Gender Transformative outcomes assessed?</b>                            |          |
|    | Yes                                                                             | Checkbox |
|    | No                                                                              | Checkbox |
| 9a | <b>If yes, how were Gender Transformative outcomes assessed?</b>                |          |
|    | Scale name/author [Add new line for each unique entry]                          | Checkbox |
| 10 | <b>Duration of participation [recruitment to last follow-up]</b>                | Text     |
| 11 | <b>Participants /Population description [type and number]</b>                   |          |
|    | Intervention                                                                    | Text     |
|    | Control                                                                         | Text     |
| 12 | <b>Inclusion criteria</b>                                                       | Text     |
| 13 | <b>Exclusion criteria</b>                                                       | Text     |
| 14 | <b>Method of recruitment</b>                                                    | Text     |

| #  | Question                                                                    | Type          |
|----|-----------------------------------------------------------------------------|---------------|
|    |                                                                             |               |
| 15 | <b>Sex breakdown INTERVENTION</b>                                           |               |
|    | Male (n=?)                                                                  | Text          |
|    | Female (n=?)                                                                | Text          |
| 16 | <b>Sex breakdown CONTROL</b>                                                |               |
|    | Male (n=?)                                                                  | Text          |
|    | Female (n=?)                                                                | Text          |
| 17 | <b>Age</b>                                                                  | Text          |
| 18 | <b>Ethnicity</b>                                                            | Text          |
| 19 | <b>Marital status</b>                                                       | Text          |
| 20 | <b>Other relevant socio-demographics</b> (e.g. pregnancy/parenthood status) | Text          |
| 21 | <b>Intervention delivery - Group/Individual</b>                             |               |
|    | Group                                                                       | Checkbox      |
|    | Couple                                                                      | Checkbox      |
|    | Individual                                                                  | Checkbox      |
|    | Other [specify]                                                             | Checkbox/Text |
| 22 | <b>Intervention delivery - Gender</b>                                       |               |
|    | Delivered to both men and women in mixed sex groups                         | Checkbox      |
|    | Delivered to both men and women in single sex groups                        | Checkbox      |
|    | Delivered to men/boys only                                                  | Checkbox      |

| #         | Question                                                                                                                                                                                                   | Type          |
|-----------|------------------------------------------------------------------------------------------------------------------------------------------------------------------------------------------------------------|---------------|
|           | Delivered to women/girls only [Exclude]                                                                                                                                                                    | Checkbox      |
|           | Other [specify]                                                                                                                                                                                            | Checkbox/Text |
| <b>23</b> | <b>Intervention delivery – Setting</b>                                                                                                                                                                     |               |
|           | Health care setting                                                                                                                                                                                        | Checkbox      |
|           | Home                                                                                                                                                                                                       | Checkbox      |
|           | Educational facility                                                                                                                                                                                       | Checkbox      |
|           | Community                                                                                                                                                                                                  | Checkbox      |
|           | Other (specify)                                                                                                                                                                                            | Checkbox/Text |
|           | Not reported/unclear [specify]                                                                                                                                                                             | Checkbox/Text |
| <b>25</b> | <b>Were the interventions delivered in high, middle, or low-income countries?</b>                                                                                                                          |               |
|           | Low [specify]                                                                                                                                                                                              | Checkbox/Text |
|           | Middle [specify]                                                                                                                                                                                           | Checkbox/Text |
|           | High [specify]                                                                                                                                                                                             | Checkbox/Text |
| <b>26</b> | <b>Key conclusions of study authors:<br/>Was the intervention considered effective? Which outcomes?</b>                                                                                                    | Text          |
| <b>27</b> | <b>Key conclusions of study authors:<br/>Was the <i>Gender Transformative</i> component considered effective? (e.g. effect on measures of gender equality, hegemonic masculinity, social/gender roles)</b> | Text          |
| <b>28</b> | <b>Were there any positive or negative unintended effects of the intervention?</b>                                                                                                                         | Text          |
