# Supplementary material for: Gender-transformative programming with men and boys to improve sexual and reproductive health and rights: a systematic review of intervention studies
Source: PubMed Central journal article supplement — BMJ Glob Health. 2020 Oct 13;5(10):e002997. doi: 10.1136/bmjgh-2020-002997 (PMC7554509; doi:10.1136/bmjgh-2020-002997), 2020-10-13
Supplement: bmjgh-2020-002997supp006.pdf [file bmjgh-2020-002997supp006.pdf]

## Supplement 6

### Efficacy of All Interventions Included in Review

| Intervention                            | Num. RCTs | Num. QE | Intervention Studies                                          | Risk of Bias             | Countries             | WB Country Income | SRHR Domain (1-7) | Outcome Level / Conclusions<br>[+ Positive Effect; - Nil Effect, +- Some Positive/Nil Effects] |             |            |         |
|-----------------------------------------|-----------|---------|---------------------------------------------------------------|--------------------------|-----------------------|-------------------|-------------------|------------------------------------------------------------------------------------------------|-------------|------------|---------|
|                                         |           |         |                                                               |                          |                       |                   |                   | Behavioural                                                                                    | Attitudinal | Biological | Overall |
| Addis Birhan Project                    | 0         | 1       | 53. Erulkar (2011)                                            | Serious                  | Ethiopia              | LIC               | 1, 2, 4, 6, 7     | +                                                                                              | +           |            | +       |
| Alternatives to Violence (ATV)          | 1         | 0       | 36. Davis (2000)<br>119. Maxwell (2004)<br>163. Taylor (2001) | High                     | USA                   | HIC               | 7                 | +                                                                                              |             |            | +       |
| Border Adolescent Development Programme | 0         | 1       | 5. Ara (2010)                                                 | Moderate                 | India                 | MIC               | 4, 6, 7           |                                                                                                | +           |            | +       |
| C-Change                                | 1         | 1       | 152. Schuler (2012)<br>153. Schuler (2012)                    | High<br>High             | Tanzania<br>Guatemala | LIC<br>MIC        | 1                 | -<br>-                                                                                         | +           |            | +-      |
| Coaching Boys into Men (CBIM);          | 1         | 1       | 35. Das (2012)<br>121. Miller (2012)<br>122. Miller (2014)    | Serious<br>Some Concerns | USA                   | HIC               | 6, 7              | +-<br>+-                                                                                       | +-<br>+-    |            | +-      |

| Intervention                       | Num. RCTs | Num. QE | Intervention Studies                                                                                                                                                                    | Risk of Bias                                                               | Countries                                | WB Country Income                      | SRHR Domain (1-7) | Outcome Level / Conclusions<br>[+ Positive Effect; - Nil Effect, +- Some Positive/Nil Effects] |                                           |            |         |
|------------------------------------|-----------|---------|-----------------------------------------------------------------------------------------------------------------------------------------------------------------------------------------|----------------------------------------------------------------------------|------------------------------------------|----------------------------------------|-------------------|------------------------------------------------------------------------------------------------|-------------------------------------------|------------|---------|
|                                    |           |         |                                                                                                                                                                                         |                                                                            |                                          |                                        |                   | Behavioural                                                                                    | Attitudinal                               | Biological | Overall |
| The Parivartan Program             |           |         |                                                                                                                                                                                         | Moderate                                                                   |                                          |                                        |                   | +-                                                                                             | +-                                        |            |         |
| Dating Violence Prevention Program | 0         | 1       | 8. Avery-Leaf (1997)                                                                                                                                                                    | Moderate                                                                   | USA                                      | HIC                                    | 7                 | +                                                                                              | +                                         |            | +       |
| Duluth Model; ATV                  | 6         | 2       | 56. Feder (2000)<br>57. Feder (2002)<br>58. Feder (2004)<br>36. Davis (2000)<br>119. Maxwell (2004)<br>163. Taylor (2001)<br>164. Taylor (2009)<br>75. Harell (1991)<br>112. Lin (2009) | High<br>High<br>High<br>High<br>High<br>High<br>High<br>Serious<br>Serious | USA<br><br><br><br><br><br><br><br>Nepal | HIC<br><br><br><br><br><br><br><br>LIC | 7                 | -<br>-<br>-<br>-<br>+<br>+-<br>+<br>+-<br>-                                                    | -<br>-<br>-<br>-<br>-<br>-<br>-<br>-<br>- |            | -       |

| Intervention                                   | Num. RCTs | Num. QE | Intervention Studies  | Risk of Bias  | Countries | WB Country Income | SRHR Domain (1-7) | Outcome Level / Conclusions<br>[+ Positive Effect; - Nil Effect, +- Some Positive/Nil Effects] |             |            |         |
|------------------------------------------------|-----------|---------|-----------------------|---------------|-----------|-------------------|-------------------|------------------------------------------------------------------------------------------------|-------------|------------|---------|
|                                                |           |         |                       |               |           |                   |                   | Behavioural                                                                                    | Attitudinal | Biological | Overall |
|                                                |           |         |                       |               |           |                   |                   | +-                                                                                             |             |            |         |
| Engaging Boys and Men in Gender Transformation | 0         | 1       | 143. Pulerwitz (2015) | Moderate      | Ethiopia  | LIC               | 4, 7              | +                                                                                              | +           |            | +       |
| Gender Equity Movement in Schools (GEMS)       | 0         | 1       | 3. Achyut (2011)      | Serious       | India     | MIC               | 6, 7              | +                                                                                              | +           |            | +       |
| HoMBReS-2                                      | 1         | 0       | 144. Rhodes (2011)    | Some concerns | USA       | HIC               | 4                 | +                                                                                              | -           |            | +       |
| How to Help a Sexual Assault Survivor          | 0         | 1       | 64. Foubert (1997)    | Serious       | USA       | HIC               | 4, 7              |                                                                                                | +           |            | +       |
| IMPower for girls;<br>50:50 for boys           | 1         | 0       | 11. Baiocchi (2017)   | High          | Kenya     | MIC               | 6                 | +                                                                                              | +           |            | +       |

| Intervention                                       | Num. RCTs | Num. QE | Intervention Studies                           | Risk of Bias        | Countries            | WB Country Income | SRHR Domain (1-7) | Outcome Level / Conclusions<br>[+ Positive Effect; - Nil Effect, +- Some Positive/Nil Effects] |             |            |         |
|----------------------------------------------------|-----------|---------|------------------------------------------------|---------------------|----------------------|-------------------|-------------------|------------------------------------------------------------------------------------------------|-------------|------------|---------|
|                                                    |           |         |                                                |                     |                      |                   |                   | Behavioural                                                                                    | Attitudinal | Biological | Overall |
| Information, Education, and Communication          | 0         | 1       | 25. Chege (2004)                               |                     | Ethiopia, Kenya      | LIC, MIC          | 7                 | +-                                                                                             | +           |            | +       |
| Inner Spaces, Outer Faces                          | 0         | 1       | 14. Bartel (2010)                              | Serious             | India                | HIC               | 1, 2, 7           | +                                                                                              | +           |            | +       |
| Life Skills Programme                              | 0         | 1       | 85. James (2006)                               |                     | Brazil, India, Chile | HIC, MIC          | 4, 6, 7           | -                                                                                              | -           |            | -       |
| Male Norms Initiative                              | 0         | 2       | 141. Pulerwitz (2006)<br>142. Pulerwitz (2010) | Serious<br>Moderate | Brazil<br>Ethiopia   | MIC<br>LIC        | 4, 7              | +                                                                                              | +           | +          | +       |
| Men & Women in Partnership Initiative              | 1         | 0       | 84. Hossain (2014)                             | High                | Côte d'Ivoire        | MIC               | 4, 7              | -                                                                                              | +           |            | +-      |
| Men as Allies; Working Together manual; Courage of | 0         | 1       | 81. Hillenbrand-Gunn (2010)                    | Serious             | USA                  | HIC               | 4, 7              |                                                                                                | +           |            | +       |

| Intervention                                                             | Num. RCTs | Num. QE | Intervention Studies                                                                                 | Risk of Bias                              | Countries                                              | WB Country Income             | SRHR Domain (1-7) | Outcome Level / Conclusions<br>[+ Positive Effect; - Nil Effect, +- Some Positive/Nil Effects] |             |            |         |
|--------------------------------------------------------------------------|-----------|---------|------------------------------------------------------------------------------------------------------|-------------------------------------------|--------------------------------------------------------|-------------------------------|-------------------|------------------------------------------------------------------------------------------------|-------------|------------|---------|
|                                                                          |           |         |                                                                                                      |                                           |                                                        |                               |                   | Behavioural                                                                                    | Attitudinal | Biological | Overall |
| Heroes; Gonna Make It: The Video; My Strength Is Not for Hurting posters |           |         |                                                                                                      |                                           |                                                        |                               |                   |                                                                                                |             |            |         |
| No Means No Worldwide; Your Moment of Truth                              | 0         | 1       | 100. Keller (2017)                                                                                   | Serious                                   | Kenya                                                  | MIC                           | 7                 | +                                                                                              | +           |            | +       |
| Program H; Male Norms Initiative; The Yaari-Dosti Intervention           | 0         | 4       | 140. Pulerwitz (2015)<br>141. Pulerwitz (2006)<br>169. Verma (2008)<br>85. Instituto Promundo (2012) | Serious<br>Serious<br>Moderate<br>Serious | Ethiopia<br>Brazil<br>Ethiopia<br>Brazil, India, Chile | LIC<br>MIC<br>LIC<br>MIC, LIC | 4, 7              | +                                                                                              | +           | +          | +       |
| Project Connect                                                          | 1         | 0       | 52. El-Bassel (2005)                                                                                 | High                                      | USA                                                    | HIC                           | 4                 | +                                                                                              |             |            | +       |

| Intervention                                               | Num. RCTs | Num. QE | Intervention Studies                                                             | Risk of Bias         | Countries          | WB Country Income  | SRHR Domain (1-7) | Outcome Level / Conclusions<br>[+ Positive Effect; - Nil Effect, +- Some Positive/Nil Effects] |             |            |         |
|------------------------------------------------------------|-----------|---------|----------------------------------------------------------------------------------|----------------------|--------------------|--------------------|-------------------|------------------------------------------------------------------------------------------------|-------------|------------|---------|
|                                                            |           |         |                                                                                  |                      |                    |                    |                   | Behavioural                                                                                    | Attitudinal | Biological | Overall |
| Reaching and Teaching Teens to Stop Violence               | 0         | 1       | 172. Weisz (2001)                                                                | Moderate             | USA                | HIC                | 6                 |                                                                                                | +           |            | +       |
| RealConsent                                                | 1         | 0       | 149. Salazar (2014)                                                              | Some concerns        | USA                | HIC                | 4, 7              | +                                                                                              | +           |            | +       |
| Regai Dzive Shiri                                          | 1         | 0       | 29. Cowan (2010)                                                                 | High                 | Zimbabwe           | MIC                | 1, 4, 7           | -                                                                                              | +-          | -          | -       |
| Responsible, Engaged, and Loving (REAL) Fathers Initiative | 0         | 1       | 7. Ashburn (2017)                                                                | Serious              | Uganda             | LIC                | 7                 | +                                                                                              | +           |            | +       |
| Safe Dates                                                 | 2         | 0       | 60. Foshee (1998)<br>61. Foshee (2000)<br>63. Foshee (2005)<br>62. Foshee (2004) | High<br><br><br>High | USA<br><br><br>USA | HIC<br><br><br>HIC | 6<br><br><br>6    | +                                                                                              | +           |            | +-      |
|                                                            |           |         |                                                                                  |                      |                    |                    |                   | -                                                                                              | +-          |            |         |
|                                                            |           |         |                                                                                  |                      |                    |                    |                   | +                                                                                              | +           |            |         |
|                                                            |           |         |                                                                                  |                      |                    |                    |                   | -                                                                                              |             |            |         |

| Intervention                                        | Num. RCTs | Num. QE | Intervention Studies                                                                        | Risk of Bias                                              | Countries                                                              | WB Country Income          | SRHR Domain (1-7) | Outcome Level / Conclusions<br>[+ Positive Effect; - Nil Effect, +- Some Positive/Nil Effects] |                   |            |         |
|-----------------------------------------------------|-----------|---------|---------------------------------------------------------------------------------------------|-----------------------------------------------------------|------------------------------------------------------------------------|----------------------------|-------------------|------------------------------------------------------------------------------------------------|-------------------|------------|---------|
|                                                     |           |         |                                                                                             |                                                           |                                                                        |                            |                   | Behavioural                                                                                    | Attitudinal       | Biological | Overall |
| Safe Homes and Respect for Everyone (SHARE) Project | 1         | 0       | 171. Wagman (2015)                                                                          | High                                                      | USA                                                                    | HIC                        | 4, 7              | +-                                                                                             |                   | +          | +       |
| SASA!                                               | 1         | 0       | 1. Abramsky (2014),<br>2. Abramsky (2016),<br>108. Kyegombe (2014),<br>109. Kyegombe (2015) | Some concerns,<br><br>Some concerns,<br><br>High,<br>High | Uganda                                                                 | LIC                        | 4, 7              | +                                                                                              | +                 |            | +       |
| Stepping Stones                                     | 3         | 1       | 91. Jewkes (2008)<br>85. Instituto Promundo<br>152. Schuler (2012)<br>153. Schuler (2012)   | High<br>Serious<br>High<br>High                           | South Africa;<br>Brazil,<br>India,<br>Chile;<br>Tanzania;<br>Guatemala | MIC<br>M/HIC<br>LIC<br>MIC | 1, 4, 7           | +-<br>+<br>-<br>-                                                                              | +-<br>+<br>+<br>+ | -          | +-      |

| Intervention                                                                                     | Num. RCTs | Num. QE | Intervention Studies         | Risk of Bias | Countries                               | WB Country Income | SRHR Domain (1-7) | Outcome Level / Conclusions<br>[+ Positive Effect; - Nil Effect, +- Some Positive/Nil Effects] |             |            |         |
|--------------------------------------------------------------------------------------------------|-----------|---------|------------------------------|--------------|-----------------------------------------|-------------------|-------------------|------------------------------------------------------------------------------------------------|-------------|------------|---------|
|                                                                                                  |           |         |                              |              |                                         |                   |                   | Behavioural                                                                                    | Attitudinal | Biological | Overall |
| The Male Motivator intervention                                                                  | 1         | 0       | 156. Shattuck (2011)         | Moderate     | Malawi                                  | LIC               | 1                 | +                                                                                              | +           |            | +       |
| The Parrot program                                                                               | 1         | 0       | 55. Fay (2006)               | High         | USA                                     | HIC               | 4, 7              |                                                                                                | +           |            | +       |
| The PRACHAR Project                                                                              | 0         | 1       | 33. Daniel (2008)            | Moderate     | India                                   | HIC               | 1                 | +                                                                                              | +           |            | +       |
| The TOSTAN Program                                                                               | 0         | 1       | 39. Diop (2004)              | Serious      | Senegal                                 | MIC               | 1, 2, 4, 7        | -                                                                                              | +           |            | +-      |
| The Yaari-Dosti Intervention                                                                     | 0         | 1       | 169. Verma (2008)            | Moderate     | India                                   | HIC               | 4, 7              | +                                                                                              | +           |            | +       |
| The Young Men Initiative (YMI); M manual; Social marketing campaign: "Budi muško" or "Be a man." | 0         | 1       | 21. CAREinternational (2012) | Serious      | Bosnia and Herzegovina, Serbia, Croatia | MIC, HIC          | 1, 4, 6, 7        | +-                                                                                             | +-          |            | +-      |

| Intervention                                                               | Num. RCTs | Num. QE | Intervention Studies    | Risk of Bias  | Countries     | WB Country Income | SRHR Domain (1-7) | Outcome Level / Conclusions<br>[+ Positive Effect; - Nil Effect, +- Some Positive/Nil Effects] |             |            |         |
|----------------------------------------------------------------------------|-----------|---------|-------------------------|---------------|---------------|-------------------|-------------------|------------------------------------------------------------------------------------------------|-------------|------------|---------|
|                                                                            |           |         |                         |               |               |                   |                   | Behavioural                                                                                    | Attitudinal | Biological | Overall |
| Village savings and loans associations (VSLA) and "gender dialogue groups" | 1         | 0       | 72. Gupta (2013)        | Some concerns | Côte d'Ivoire | MIC               | 4, 7              | +-                                                                                             | +-          |            | +-      |
| Violence Prevention Mentoring Program (VPMP)                               | 1         | 0       | 148. Salazar (2006)     | High          | USA           | HIC               | 6                 |                                                                                                | +-          |            |         |
| Youth Relationships Project (YRP)                                          | 0         | 1       | 175. Wolfe (2003)       | Moderate      | Canada        | HIC               | 6                 | +                                                                                              | +           |            | +       |
| <i>Unnamed</i>                                                             | 0         | 1       | 22 Chamroonsawasdi 2010 | Serious       | Thailand      | MIC               | 7                 |                                                                                                | +           |            | +       |
| <i>Unnamed</i>                                                             | 1         | 0       | 37 Davis 2002           | High          | USA           | HIC               | 7                 |                                                                                                | +-          |            | +-      |
| <i>Unnamed</i>                                                             | 0         | 1       | 54 Exner 2009           | Moderate      | Nigeria       | MIC               | 1, 4, 7           | +                                                                                              | +           |            | +       |

| Intervention | Num. RCTs | Num. QE | Intervention Studies | Risk of Bias  | Countries    | WB Country Income | SRHR Domain (1-7) | Outcome Level / Conclusions<br>[+ Positive Effect; - Nil Effect, +- Some Positive/Nil Effects] |             |            |         |
|--------------|-----------|---------|----------------------|---------------|--------------|-------------------|-------------------|------------------------------------------------------------------------------------------------|-------------|------------|---------|
|              |           |         |                      |               |              |                   |                   | Behavioural                                                                                    | Attitudinal | Biological | Overall |
| Unnamed      | 0         | 1       | 65 Fuertes 2012      | Moderate      | Spain        | HIC               | 7                 | +-                                                                                             | +           |            | +       |
| Unnamed      | 1         | 0       | 68 Gidycz 2011       | Some Concerns | USA          | HIC               | 7                 | +                                                                                              | +           |            | +       |
| Unnamed      | 0         | 1       | 69 Gordon 2003       | Serious       | USA          | HIC               | 7                 | +-                                                                                             |             |            | +-      |
| Unnamed      | 0         | 1       | 96 Kalichman 2009    | Moderate      | South Africa | MIC               | 4.7               | +                                                                                              | +           |            | +       |
| Unnamed      | 1         | 0       | 110 Labriola 2005    | High          | USA          | HIC               | 7                 | +                                                                                              | -           |            | +-      |
| Unnamed      | 0         | 1       | 116 Macgowan 1997    | Serious       | USA          | HIC               | 6                 |                                                                                                | +           |            | +       |
| Unnamed      | 1         | 0       | 151 Saunders 1996    | High          | USA          | HIC               | 7                 | -                                                                                              | -           |            | -       |

| Intervention | Num. RCTs | Num. QE | Intervention Studies | Risk of Bias | Countries    | WB Country Income | SRHR Domain (1-7) | Outcome Level / Conclusions<br>[+ Positive Effect; - Nil Effect, +- Some Positive/Nil Effects] |             |            |         |
|--------------|-----------|---------|----------------------|--------------|--------------|-------------------|-------------------|------------------------------------------------------------------------------------------------|-------------|------------|---------|
|              |           |         |                      |              |              |                   |                   | Behavioural                                                                                    | Attitudinal | Biological | Overall |
| Unnamed      | 1         | 0       | 154 Schwarz 2004     | High         | USA          | HIC               | 7                 |                                                                                                | +           |            | +       |
| Unnamed      | 1         | 0       | 162 Taylor 2012      | High         | South Africa | MIC               | 6                 | +-                                                                                             |             |            | +-      |

LIC = Low Income Country. MIC = Middle Income Country, HIC = High Income Country
