# Supplementary material for: Gender-transformative programming with men and boys to improve sexual and reproductive health and rights: a systematic review of intervention studies
Source: PubMed Central journal article supplement — BMJ Glob Health. 2020 Oct 13;5(10):e002997. doi: 10.1136/bmjgh-2020-002997 (PMC7554509; doi:10.1136/bmjgh-2020-002997), 2020-10-13
Supplement: bmjgh-2020-002997supp007.pdf [file bmjgh-2020-002997supp007.pdf]

## Supplement 7

### Risk of Bias Assessments

#### Risk of Bias Assessment for Quasi-Experimental Studies (ROBINS-I)

| Author, Year           | Bias due to confounding<br>(Domain 1) | Bias in selection of participants into the study<br>(Domain 2) | Bias in classification of interventions<br>(Domain 3) | Bias due to deviations from intended interventions<br>(Domain 4) | Bias due to missing data<br>(Domain 5) | Bias in measurement of outcomes<br>(Domain 6) | Bias in selection of the reported result<br>(Domain 7) | Overall bias |
|------------------------|---------------------------------------|----------------------------------------------------------------|-------------------------------------------------------|------------------------------------------------------------------|----------------------------------------|-----------------------------------------------|--------------------------------------------------------|--------------|
| Achyut 2011            | Moderate                              | Low                                                            | Moderate                                              | Serious                                                          | Serious                                | Moderate                                      | Moderate                                               | Serious      |
| Ara 2010               | Moderate                              | NI                                                             | Moderate                                              | Moderate                                                         | Low                                    | Moderate                                      | Moderate                                               | Moderate     |
| Ashburn 2017           | Moderate                              | Serious                                                        | Low                                                   | Moderate                                                         | Low                                    | Moderate                                      | Moderate                                               | Serious      |
| Avery-Leaf 1997        | Moderate                              | Low                                                            | Low                                                   | Low                                                              | Low                                    | Moderate                                      | Low                                                    | Moderate     |
| Bartel 2010            | Moderate                              | NI                                                             | Serious                                               | NI                                                               | NI                                     | Moderate                                      | Moderate                                               | Serious      |
| CAREInternational 2012 | NI                                    | NI                                                             | Serious                                               | NI                                                               | NI                                     | Moderate                                      | Serious                                                | Serious      |
| Chamroonsawasdi 2010   | Serious                               | NI                                                             | Low                                                   | NI                                                               | NI                                     | Moderate                                      | Low                                                    | Serious      |
| Chege 2004             | Moderate                              | Moderate                                                       | High                                                  | High                                                             | Low                                    | Moderate                                      | Serious                                                | Serious      |
| Daniel 2008            | Moderate                              | Moderate                                                       | Moderate                                              | NI                                                               | Moderate                               | Moderate                                      | Moderate                                               | Moderate     |
| Das 2012               | Serious                               | NI                                                             | Moderate                                              | Moderate                                                         | NI                                     | Moderate                                      | Moderate                                               | Serious      |

|                         |          |          |          |          |         |          |          |          |
|-------------------------|----------|----------|----------|----------|---------|----------|----------|----------|
| Diop 2004               | Moderate | Moderate | Moderate | Serious  | Low     | Serious  | Low      | Serious  |
| Erulkar 2011            | Serious  | Serious  | Serious  | Serious  | NI      | Moderate | Moderate | Serious  |
| Exner 2009              | Moderate | Moderate | Moderate | Low      | Low     | Moderate | Low      | Moderate |
| Foubert 1997            | Moderate | NI       | Low      | Moderate | Serious | Moderate | Low      | Serious  |
| Fuertes 2012            | Moderate | Moderate | Moderate | NI       | NI      | Moderate | Moderate | Moderate |
| Gordon 2003             | Low      | Serious  | Low      | Low      | Low     | Low      | Low      | Serious  |
| Harrell 1991            | Moderate | Serious  | NI       | Moderate | Low     | Moderate | Low      | Serious  |
| Hillenbrand-Gunn 2010   | Moderate | Moderate | Moderate | Moderate | Serious | Moderate | Moderate | Serious  |
| Instituto Promundo 2012 | Serious  | NI       | Serious  | Moderate | Serious | Moderate | Low      | Serious  |
| Kalichman 2009          | Low      | Low      | Low      | NI       | Low     | Moderate | Low      | Moderate |
| Keller 2017             | Moderate | Low      | Low      | Low      | Serious | Moderate | Low      | Serious  |
| Lin 2009                | Serious  | Serious  | Low      | Low      | Low     | Moderate | Low      | Serious  |
| Lundgren 2013           | Moderate | Low      | NI       | NI       | Low     | Moderate | Low      | Moderate |
| Macgowan 1997           | Low      | Moderate | Moderate | Moderate | Serious | Moderate | Low      | Serious  |
| Miller 2014             | Moderate | Low      | Moderate | Moderate | Low     | Moderate | Low      | Moderate |
| Pulerwitz 2006          | Moderate | Moderate | Low      | Moderate | Serious | Moderate | Low      | Serious  |
| Pulerwitz 2010          | Moderate | Moderate | Moderate | Low      | Low     | Moderate | Low      | Moderate |
| Pulerwitz 2015          | Moderate | Moderate | Moderate | Low      | Low     | Moderate | Low      | Moderate |
| Schwarz 2004            | Low      | Low      | Moderate | Low      | Low     | Moderate | Low      | Moderate |

|            |          |          |          |     |          |          |     |          |
|------------|----------|----------|----------|-----|----------|----------|-----|----------|
| Verma 2008 | Moderate | NI       | Low      | Low | Moderate | Moderate | Low | Moderate |
| Weisz 2001 | Low      | Low      | Moderate | Low | Moderate | Moderate | Low | Moderate |
| Wolfe 2003 | Low      | Moderate | Low      | Low | Low      | Moderate | Low | Moderate |

**RESPONSE OPTION**

Low risk of bias (the study is comparable to a well-performed randomized trial);

Moderate risk of bias (the study appears to provide sound evidence for a non-randomized study but cannot be considered comparable to a well-performed randomized trial);

Serious risk of bias (the study has some important problems);

Critical risk of bias (the study is too problematic to provide any useful evidence and should not be included in any synthesis);

No information on which to base a judgement about risk of bias.

**CRITERIA**

The study is judged to be at **low risk of bias for all domains**.

The study is judged to be at **low or moderate risk of bias for all domains**.

The study is judged to be at **serious risk of bias** in at least one domain, but not at critical risk of bias in any domain.

The study is judged to be at **critical risk of bias in at least one domain**.

There is no clear indication that the study is at serious or critical risk of bias *and* there is a lack of information in one or more key domains of bias (*a judgement is required for this*).

*Risk of Bias Assessment for Randomised Control Trials (RoB 2.0)*

| RefID | Author, Year   | Risk of bias arising from the randomization process (Domain 1) | Risk of bias due to deviations from the intended interventions (Domain 2) | Missing outcome data (Domain 3) | Risk of bias in measurement of the outcome (Domain 4) | Risk of bias in selection of the reported result (Domain 5) | Overall bias  |
|-------|----------------|----------------------------------------------------------------|---------------------------------------------------------------------------|---------------------------------|-------------------------------------------------------|-------------------------------------------------------------|---------------|
| 1     | Abramsky 2014  | Low                                                            | Some concerns                                                             | Low                             | Some concerns                                         | Low                                                         | Some concerns |
| 2     | Abramsky 2016  | Low                                                            | Some concerns                                                             | Low                             | Some concerns                                         | Low                                                         | Some concerns |
| 11    | Baiocchi 2017  | Low                                                            | High                                                                      | Low                             | High                                                  | Some concerns                                               | High          |
| 29    | Cowan 2010     | High                                                           | High                                                                      | Some concerns                   | Some concerns                                         | Low                                                         | High          |
| 36    | Davis 2000     | High                                                           | High                                                                      | High                            | Some concerns                                         | High                                                        | High          |
| 37    | Davis 2002     | Low                                                            | High                                                                      | Low                             | Some concerns                                         | Some concerns                                               | High          |
| 52    | El-Bassel 2005 | Low                                                            | Some concerns                                                             | High                            | Low                                                   | Some concerns                                               | High          |
| 55    | Fay 2006       | High                                                           | High                                                                      | High                            | Some concerns                                         | Some concerns                                               | High          |
| 56    | Feder 2000     | High                                                           | High                                                                      | High                            | Some concerns                                         | Some concerns                                               | High          |
| 57    | Feder 2002     | High                                                           | High                                                                      | High                            | Some concerns                                         | Some concerns                                               | High          |
| 58    | Feder 2004     | High                                                           | High                                                                      | High                            | Some concerns                                         | Some concerns                                               | High          |
| 60    | Foshee 1998    | Some concerns                                                  | High                                                                      | Low                             | Some concerns                                         | Some concerns                                               | High          |
| 61    | Foshee 2000    | Some concerns                                                  | High                                                                      | Low                             | Some concerns                                         | Some concerns                                               | High          |
| 62    | Foshee 2004    | Some concerns                                                  | High                                                                      | High                            | Some concerns                                         | Some concerns                                               | High          |
| 63    | Foshee 2005    | Some concerns                                                  | High                                                                      | High                            | Some concerns                                         | High                                                        | High          |

|     |               |               |               |               |               |               |               |
|-----|---------------|---------------|---------------|---------------|---------------|---------------|---------------|
| 68  | Gidycz 2011   | Low           | Some concerns | Low           | Some concerns | Some concerns | Some concerns |
| 72  | Gupta 2013    | Some concerns | Some concerns | Low           | Some concerns | Low           | Some concerns |
| 84  | Hossain 2014  | Some concerns | High          | Low           | High          | Some concerns | High          |
| 86  | James 2006    | Some concerns | Some concerns | High          | Some concerns | Some concerns | High          |
| 91  | Jewkes 2008   | High          | High          | Low           | Low           | Some concerns | High          |
| 108 | Kyegombe 2014 | Low           | High          | Low           | Some concerns | Low           | High          |
| 109 | Kyegombe 2015 | Low           | High          | Low           | Some concerns | Low           | High          |
| 110 | Labriola 2005 | Some concerns | High          | Low           | Some concerns | Some concerns | High          |
| 119 | Maxwell 2004  | Some concerns | High          | Some concerns | Some concerns | Some concerns | High          |
| 121 | Miller 2012   | Some concerns | Some concerns | Low           | Some concerns | Some concerns | Some concerns |
| 144 | Rhodes 2011   | Low           | Some concerns | Low           | Some concerns | Some concerns | Some concerns |
| 148 | Salazar 2006  | Low           | High          | Low           | High          | High          | High          |
| 149 | Salazar 2014  | Low           | Low           | Some concerns | Low           | Some concerns | Some concerns |
| 151 | Saunders 1996 | Low           | High          | Some concerns | Low           | Some concerns | High          |
| 152 | Schuler 2012  | Low           | High          | High          | High          | Some concerns | High          |
| 153 | Schuler 2012  | Low           | High          | High          | High          | Some concerns | High          |
| 156 | Shattuck 2011 | Low           | Low           | Low           | Some concerns | Some concerns | Some concerns |
| 162 | Taylor 2012   | Some concerns | High          | Low           | Some concerns | Some concerns | High          |
| 163 | Taylor 2001   | High          | High          | High          | Some concerns | Some concerns | High          |
| 164 | Taylor 2009   | Some concerns | High          | Low           | High          | Some concerns | High          |

|     |             |     |     |      |               |     |      |
|-----|-------------|-----|-----|------|---------------|-----|------|
| 171 | Wagman 2015 | Low | Low | High | Some concerns | Low | High |
|-----|-------------|-----|-----|------|---------------|-----|------|

**OVERALL RISK-OF-BIAS  
JUDGEMENT**

Low risk of bias

Some concerns

High risk of bias

**CRITERIA**

The study is judged to be at **low risk of bias for all domains** for this result.

The study is judged to raise **some concerns** in at least one domain for this result, but not to be at high risk of bias for any domain.

The study is judged to be at **high risk of bias** in at least one domain for this result.

Or

The study is judged to have **some concerns for multiple domains** in a way that substantially lowers confidence in the result.
