# Supplementary material for: Gender-transformative programming with men and boys to improve sexual and reproductive health and rights: a systematic review of intervention studies
Source: PubMed Central journal article supplement — BMJ Glob Health. 2020 Oct 13;5(10):e002997. doi: 10.1136/bmjgh-2020-002997 (PMC7554509; doi:10.1136/bmjgh-2020-002997), 2020-10-13
Supplement: bmjgh-2020-002997supp008.pdf [file bmjgh-2020-002997supp008.pdf]

## Supplement 8

### Overview of WHO SRHR Domain Outcomes (1-7) Addressed by Review Studies

| SRHR Domain (1-7)*                                                      | Study                        | Subdomain                                                                          | World Bank Category (Country)                      | Gender       |       | Biological | Behavioural | Attitudinal |
|-------------------------------------------------------------------------|------------------------------|------------------------------------------------------------------------------------|----------------------------------------------------|--------------|-------|------------|-------------|-------------|
|                                                                         |                              |                                                                                    |                                                    | Intervention | Study |            |             |             |
| <b>1. Helping people realise their desired family size</b>              |                              |                                                                                    |                                                    |              |       |            |             |             |
| 1, 2, 7                                                                 | 14 Bartel (2010)             | Contraception                                                                      | MIC (India)                                        | M+F          | F     | X          | ✓           | ✓           |
| 1, 4, 6, 7                                                              | 21 CARE International (2012) | Contraception                                                                      | MIC, HIC (Bosnia and Herzegovina, Serbia, Croatia) | M            | M     | X          | ✓           | ✓           |
| 1, 4, 7                                                                 | 29 Cowan (2010)              | Contraception (condom use/self-efficacy)                                           | MIC (Zimbabwe)                                     | M+F          | M+F   | ✓          | ✓           | ✓           |
| 1                                                                       | 33 Daniel (2008)             | Contraception; birth spacing                                                       | MIC (India)                                        | M+F          | F     | X          | ✓           | ✓           |
| 1, 2, 4, 7                                                              | 39 Diop (2004)               | Contraception                                                                      | MIC (Senegal)                                      | M+F          | M+F   | X          | ✓           | ✓           |
| 1, 2, 4, 6, 7                                                           | 53 Erulkar (2011)            | Family planning/birth spacing/number of children; contraception (condom use)       | LIC (Ethiopia)                                     | M            | M     | X          | ✓           | ✓           |
| 1, 4, 7                                                                 | 54 Exner (2009)              | Contraception                                                                      | MIC (Nigeria)                                      | M            | M     | X          | ✓           | ✓           |
| 1                                                                       | 152 Schuler (2012)           | Family planning; contraception                                                     | LIC (Tanzania)                                     | M+F          | M+F   | X          | ✓           | ✓           |
| 1                                                                       | 153 Schuler (2012)           | Family planning                                                                    | MIC (Guatemala)                                    | M+F          | M+F   | X          | ✓           | ✓           |
| 1                                                                       | 156 Shattuck (2011)          | Contraception; birth spacing/family planning                                       | LIC (Malawi)                                       | M            | M     | X          | ✓           | ✓           |
| <b>2. Health of pregnant women and girls and their new born infants</b> |                              |                                                                                    |                                                    |              |       |            |             |             |
| 1, 2, 7                                                                 | 14 Bartel (2010)             | Birth preparation; skilled attendant at birth; neonatal death; breastfeeding       | MIC (India)                                        | M+F          | F     | X          | ✓           | ✓           |
| 1, 2, 4, 7                                                              | 39 Diop (2004)               | Pregnancy surveillance; safe birth/delivery service use; prenatal/child health     | MIC (Senegal)                                      | M+F          | M+F   | X          | ✓           | ✓           |
| 1, 2, 4, 6, 7                                                           | 53 Erulkar (2011)            | Birth location; family/children's health care                                      | LIC (Ethiopia)                                     | M            | M     | X          | ✓           | ✓           |
| <b>3. Preventing unsafe abortion</b>                                    |                              |                                                                                    |                                                    |              |       |            |             |             |
| <b>4. Promoting Sexual Health and Wellbeing</b>                         |                              |                                                                                    |                                                    |              |       |            |             |             |
| 4, 7                                                                    | 1 Abramsky (2014)            | HIV vulnerability                                                                  | LIC (Uganda)                                       | M+F          | M+F   | X          | ✓           | ✓           |
| 4, 7                                                                    | 2 Abramsky (2016)            | HIV vulnerability                                                                  | LIC (Uganda)                                       | M+F          | M+F   | X          | ✓           | ✓           |
| 4, 6, 7                                                                 | 5 Ara (2010)                 | HIV/AIDS                                                                           | LIC (Bangladesh)                                   | M+F          | M+F   | X          | X           | ✓           |
| 1, 4, 6, 7                                                              | 21 CARE International (2012) | STIs; HIV/AIDS                                                                     | MIC, HIC (Bosnia and Herzegovina, Serbia, Croatia) | M            | M     | X          | ✓           | ✓           |
| 1, 4, 7                                                                 | 29 Cowan (2010)              | HIV; STIs; HSV-2 (condom use/self-efficacy; clinic attendance; number partners)    | MIC (Zimbabwe)                                     | M+F          | M+F   | ✓          | ✓           | ✓           |
| 1, 2, 4, 7                                                              | 39 Diop (2004)               | Reproductive health; STIs; HIV knowledge/AIDS prevention                           | MIC (Senegal)                                      | M+F          | M+F   | X          | ✓           | ✓           |
| 4                                                                       | 52 El-Bassel (2005)          | HIV; STIs (condom use)                                                             | HIC (USA)                                          | M+F          | M+F   | X          | ✓           | X           |
| 1, 2, 4, 6, 7                                                           | 53 Erulkar (2011)            | HIV/AIDS prevention (condom use; clinic attendance; fidelity)                      | LIC (Ethiopia)                                     | M            | M     | X          | ✓           | ✓           |
| 1, 4, 7                                                                 | 54 Exner (2009)              | HIV; STIs (testing experiences; stigma; knowledge; risk perceptions and behaviour) | MIC (Nigeria)                                      | M            | M     | X          | ✓           | ✓           |

| SRHR Domain (1-7)*                                                                            | Study                        | Subdomain                                                                                                                                                                                                                                                                          | World Bank Category (Country)                      | Gender       |       | Biological | Behavioural | Attitudinal |
|-----------------------------------------------------------------------------------------------|------------------------------|------------------------------------------------------------------------------------------------------------------------------------------------------------------------------------------------------------------------------------------------------------------------------------|----------------------------------------------------|--------------|-------|------------|-------------|-------------|
|                                                                                               |                              |                                                                                                                                                                                                                                                                                    |                                                    | Intervention | Study |            |             |             |
| 4, 6, 7                                                                                       | 86 James (2006)              | HIV/AIDS (condom use and communication; HIV testing; knowledge/stigma)                                                                                                                                                                                                             | MIC (South Africa)                                 | M+F          | M+F   | X          | ✓           | ✓           |
| 4, 7                                                                                          | 91 Jewkes (2008)             | HIV (safer sex)                                                                                                                                                                                                                                                                    | MIC (South Africa)                                 | M+F          | M+F   | ✓          | ✓           | ✓           |
| 4, 7                                                                                          | 96 Kalichman (2009)          | HIV/AIDS (risk behaviours; knowledge)                                                                                                                                                                                                                                              | MIC (South Africa)                                 | M            | M     | X          | ✓           | ✓           |
| 4, 7                                                                                          | 108 Kyegombe (2014)          | HIV (condom use and communication; couple HIV testing and disclosure; number partners/fidelity)                                                                                                                                                                                    | LIC (Uganda)                                       | M+F          | M+F   | X          | ✓           | ✓           |
| 4, 7                                                                                          | 141 Pulerwitz (2006)         | STIs; HIV (symptoms; condom use; risk; number partners)                                                                                                                                                                                                                            | MIC (Brazil)                                       | M            | M     | ✓          | ✓           | ✓           |
| 4, 7                                                                                          | 142 Pulerwitz (2010)         | STIs; HIV (symptoms; condom use; risk; number partners)                                                                                                                                                                                                                            | LIC (Ethiopia)                                     | M            | M     | X          | ✓           | ✓           |
| 4, 7                                                                                          | 143 Pulerwitz (2015)         | STIs; HIV (condom use; risk)                                                                                                                                                                                                                                                       | LIC (Ethiopia)                                     | M            | M     | X          | ✓           | ✓           |
| 4                                                                                             | 144 Rhodes (2011)            | STIs; HIV (condom use; HIV testing)                                                                                                                                                                                                                                                | HIC (USA)                                          | M            | M     | X          | ✓           | ✓           |
| 4, 7                                                                                          | 169 Verma (2008)             | STIs; HIV (condom use; stigma)                                                                                                                                                                                                                                                     | MIC (India)                                        | M+F          | M     | X          | ✓           | ✓           |
| 4, 7                                                                                          | 171 Wagman (2015)            | HIV                                                                                                                                                                                                                                                                                | LIC (Uganda)                                       | M+F          | M+F   | ✓          | ✓           | ✓           |
| <b>5. Sexual and Reproductive Health in disease outbreaks</b>                                 |                              |                                                                                                                                                                                                                                                                                    |                                                    |              |       |            |             |             |
| <b>6. Healthy Adolescence for a Healthy Future</b>                                            |                              |                                                                                                                                                                                                                                                                                    |                                                    |              |       |            |             |             |
| 6, 7                                                                                          | 3 Achyut (2011)              | Gender roles; GBV; adolescent health                                                                                                                                                                                                                                               | MIC (India)                                        | M+F          | M+F   | X          | ✓           | ✓           |
| 4, 6, 7                                                                                       | 5 Ara (2010)                 | HIV/AIDS; child marriage; gender inequality; employment and labour; girls' rights to education and health; adolescent health                                                                                                                                                       | LIC (Bangladesh)                                   | M+F          | M+F   | X          | X           | ✓           |
| 1, 4, 6, 7                                                                                    | 21 CARE International (2012) | Adolescent health; motivation for youth and skills to take action against inequality                                                                                                                                                                                               | MIC, HIC (Bosnia and Herzegovina, Serbia, Croatia) | M            | M     | X          | ✓           | ✓           |
| 1, 2, 4, 6, 7                                                                                 | 53 Erulkar (2011)            | Family planning/birth spacing/number of children; contraception use (condom use); HIV/AIDS; clinic attendance; fidelity; home violence; child marriage; school attendance; sex decision making (male/female led); financial decision making; support for wife with domestic duties | LIC (Ethiopia)                                     | M            | M     | X          | ✓           | ✓           |
| 6                                                                                             | 60 Foshee (1998)             | Dating violence                                                                                                                                                                                                                                                                    | HIC (USA)                                          | M+F          | M+F   | X          | ✓           | ✓           |
| 6                                                                                             | 61 Foshee (2000)             | Dating violence                                                                                                                                                                                                                                                                    | HIC (USA)                                          | M+F          | M+F   | X          | ✓           | ✓           |
| 6                                                                                             | 62 Foshee (2004)             | Dating violence                                                                                                                                                                                                                                                                    | HIC (USA)                                          | M+F          | M+F   | X          | ✓           | X           |
| 6                                                                                             | 63 Foshee (2005)             | Dating violence                                                                                                                                                                                                                                                                    | HIC (USA)                                          | M+F          | M+F   | X          | ✓           | ✓           |
| 4, 6, 7                                                                                       | 86 James (2006)              | HIV/AIDS (condom use and communication; HIV testing; knowledge/stigma); consent                                                                                                                                                                                                    | MIC (South Africa)                                 | M+F          | M+F   | X          | ✓           | ✓           |
| 6                                                                                             | 115 Lundgren (2013)          | Gender attitudes                                                                                                                                                                                                                                                                   | LIC (Nepal)                                        | M+F          | M+F   | X          | X           | ✓           |
| 6                                                                                             | 116 Macgowan (1997)          | Dating violence                                                                                                                                                                                                                                                                    | HIC (USA)                                          | M+F          | M+F   | X          | X           | ✓           |
| 6                                                                                             | 121 Miller (2012)            | DV; willingness to intervene in peer perpetration of DV                                                                                                                                                                                                                            | HIC (USA)                                          | M            | M     | X          | ✓           | ✓           |
| 6                                                                                             | 148 Salazar (2006)           | IPV                                                                                                                                                                                                                                                                                | HIC (USA)                                          | M            | M     | X          | X           | ✓           |
| 6                                                                                             | 162 Taylor (2012)            | Teenage pregnancy; condom use                                                                                                                                                                                                                                                      | MIC (South Africa)                                 | M+F          | M+F   | X          | X           | ✓           |
| 6                                                                                             | 172 Weisz (2001)             | Dating violence; sexual assault                                                                                                                                                                                                                                                    | HIC (USA)                                          | M+F          | M+F   | X          | X           | ✓           |
| 6                                                                                             | 175 Wolfe (2003)             | Dating violence                                                                                                                                                                                                                                                                    | HIC (Canada)                                       | M+F          | M+F   | X          | X           | ✓           |
| <b>7. Preventing and responding to violence against women and girls and harmful practices</b> |                              |                                                                                                                                                                                                                                                                                    |                                                    |              |       |            |             |             |
| 4, 7                                                                                          | 1 Abramsky (2014)            | GBV; gender inequality                                                                                                                                                                                                                                                             | LIC (Uganda)                                       | M+F          | M+F   | X          | ✓           | ✓           |
| 4, 7                                                                                          | 2 Abramsky (2016)            | GBV; gender inequality                                                                                                                                                                                                                                                             | LIC (Uganda)                                       | M+F          | M+F   | X          | ✓           | ✓           |

| SRHR Domain (1-7)* | Study                        | Subdomain                                                                                                                                                                    | World Bank Category (Country)                      | Gender                         |       | Biological | Behavioural | Attitudinal |
|--------------------|------------------------------|------------------------------------------------------------------------------------------------------------------------------------------------------------------------------|----------------------------------------------------|--------------------------------|-------|------------|-------------|-------------|
|                    |                              |                                                                                                                                                                              |                                                    | Intervention                   | Study |            |             |             |
| 6, 7               | 3 Achyut (2011)              | GBV; gender roles                                                                                                                                                            | MIC (India)                                        | M+F                            | M+F   | X          | ✓           | ✓           |
| 4, 6, 7            | 5 Ara (2010)                 | Child marriage; girls' rights to education and health; gender inequality; employment and labour                                                                              | LIC (Bangladesh)                                   | M+F                            | M+F   | X          | X           | ✓           |
| 7                  | 7 Ashburn (2017)             | IPV; physical child punishment                                                                                                                                               | LIC (Uganda)                                       | M (some F partner involvement) | M     | X          | ✓           | ✓           |
| 7                  | 8 Avery-Leaf (1997)          | Dating violence (including IPV towards males)                                                                                                                                | HIC (USA)                                          | M+F                            | M+F   | X          | ✓           | ✓           |
| 7                  | 11 Baiocchi (2017)           | Sexual assault; gender norms                                                                                                                                                 | MIC (Kenya)                                        | M+F                            | F     | X          | ✓           | ✓           |
| 1, 2, 7            | 14 Bartel (2010)             | DV; gender inequality; gendered division of labour                                                                                                                           | MIC (India)                                        | M+F                            | F     | X          | ✓           | ✓           |
| 1, 4, 6, 7         | 21 CARE International (2012) | Violence prevention; inequality; gender, masculinities and health                                                                                                            | MIC, HIC (Bosnia and Herzegovina, Serbia, Croatia) | M                              | M     | X          | ✓           | ✓           |
| 7                  | 22 Chamroonsawasdi (2010)    | GBV; sexual violence; gender roles                                                                                                                                           | MIC (Thailand)                                     | M+F                            | M+F   | X          | X           | ✓           |
| 7                  | 25 Chege (2004)              | Female genital cutting (FGC as human rights issue)                                                                                                                           | LIC, MIC (Ethiopia, Kenya)                         | M+F                            | M+F   | X          | ✓           | ✓           |
| 1, 4, 7            | 29 Cowan (2010)              | Relationship control; gender empowerment                                                                                                                                     | MIC (Zimbabwe)                                     | M+F                            | M+F   | ✓          | ✓           | ✓           |
| 7                  | 35 Das (2012)                | Violence against women and girls; gender equity                                                                                                                              | MIC (India)                                        | M                              | M     | X          | ✓           | ✓           |
| 7                  | 36 Davis (2000)              | IPV; violence; family violence; conflict resolution skills                                                                                                                   | HIC (USA)                                          | M                              | M+F   | X          | ✓           | ✓           |
| 7                  | 37 Davis (2002)              | Consent/coercion; rape myths; gender role attitudes                                                                                                                          | HIC (USA)                                          | M                              | M     | X          | X           | ✓           |
| 1, 2, 4, 7         | 39 Diop (2004)               | Female genital cutting; human rights                                                                                                                                         | MIC (Senegal)                                      | M+F                            | M+F   | X          | ✓           | ✓           |
| 1, 2, 4, 6, 7      | 53 Erulkar (2011)            | Home violence; child marriage; school attendance; sex decision making (male/ female led); financial decision making; support for wife with domestic duties                   | LIC (Ethiopia)                                     | M                              | M     | X          | ✓           | ✓           |
| 1, 4, 7            | 54 Exner (2009)              | Relationship power and control                                                                                                                                               | MIC (Nigeria)                                      | M                              | M     | X          | ✓           | ✓           |
| 7                  | 55 Fay (2006)                | Rape myth acceptance; acceptance of dating violence (including IPV towards males)                                                                                            | HIC (USA)                                          | M+F                            | M+F   | X          | X           | ✓           |
| 7                  | 56 Feder (2000)              | DV (repeat); gender roles                                                                                                                                                    | HIC (USA)                                          | M                              | M+F   | X          | ✓           | ✓           |
| 7                  | 57 Feder (2002)              | DV (repeat); gender roles                                                                                                                                                    | HIC (USA)                                          | M                              | M+F   | X          | ✓           | ✓           |
| 7                  | 58 Feder (2004)              | DV (repeat); gender roles                                                                                                                                                    | HIC (USA)                                          | M                              | M+F   | X          | ✓           | ✓           |
| 7                  | 64 Foubert (1997)            | Rape myth acceptance                                                                                                                                                         | HIC (USA)                                          | M                              | M     | X          | X           | ✓           |
| 7                  | 65 Fuertes (2012)            | Coercive behaviours/sexual victimisation; stereotypical beliefs surrounding sexuality and sexual coercion; victim empathy (including IPV towards males)                      | HIC (Spain)                                        | M+F                            | M+F   | X          | ✓           | ✓           |
| 7                  | 68 Gidycz (2011)             | Consent; sexual aggression; rape myth acceptance; bystander behaviour and norms regarding sexually aggressive behaviour and other men's attitudes/behaviours; victim support | HIC (USA)                                          | M                              | M     | X          | ✓           | ✓           |
| 7                  | 69 Gordon (2003)             | DV-related offences (recidivism)                                                                                                                                             | HIC (USA)                                          | M                              | M     | X          | ✓           | X           |
| 7                  | 72 Gupta (2013)              | Physical/sexual IPV; gender norms                                                                                                                                            | MIC (Côte d'Ivoire)                                | M+F                            | M+F   | X          | ✓           | ✓           |
| 7                  | 75 Harrell (1991)            | Violent behaviour; psychological abuse; involvement with criminal justice system                                                                                             | HIC (USA)                                          | M                              | M     | X          | ✓           | ✓           |

| SRHR Domain (1-7)* | Study                        | Subdomain                                                                                                                                           | World Bank Category (Country) | Gender                          |       | Biological | Behavioural | Attitudinal |
|--------------------|------------------------------|-----------------------------------------------------------------------------------------------------------------------------------------------------|-------------------------------|---------------------------------|-------|------------|-------------|-------------|
|                    |                              |                                                                                                                                                     |                               | Intervention                    | Study |            |             |             |
| 7                  | 81 Hillenbrand-Gunn (2010)   | Rape myth acceptance; behaviour in rape-supportive situations; norms regarding discomfort with sexist situations; female self-protective behaviours | HIC (USA)                     | M+F                             | M+F   | X          | X           | ✓           |
| 7                  | 84 Hossain (2014)            | Physical/sexual IPV; male involvement in typically female household tasks                                                                           | MIC (Côte d'Ivoire)           | M                               | M+F   | X          | ✓           | ✓           |
| 7                  | 85 Instituto Promundo (2012) | Violence against women and girls; gender equality                                                                                                   | MIC (Brazil, India, Chile)    | India: M+F; Brazil and Chile: M | -     | X          | X           | ✓           |
| 4, 6, 7            | 86 James (2006)              | Consent                                                                                                                                             | MIC (South Africa)            | M+F                             | M+F   | X          | ✓           | ✓           |
| 4, 7               | 91 Jewkes (2008)             | Sexual violence; IPV                                                                                                                                | MIC (South Africa)            | M+F                             | M+F   | ✓          | ✓           | ✓           |
| 4, 7               | 96 Kalichman (2009)          | Violence against women and girls                                                                                                                    | MIC (South Africa)            | M                               | M     | X          | ✓           | ✓           |
| 7                  | 100 Keller (2017)            | GBV                                                                                                                                                 | MIC (Kenya)                   | M                               | M     | X          | X           | ✓           |
| 4, 7               | 108 Kyegombe (2014)          | IPV; gender-equitable relationships/decision making; communication                                                                                  | LIC (Uganda)                  | M+F                             | M+F   | X          | ✓           | ✓           |
| 7                  | 109 Kyegombe (2015)          | IPV; children's exposure to violence                                                                                                                | LIC (Uganda)                  | M+F                             | M+F   | X          | ✓           | ✓           |
| 7                  | 110 Labriola (2005)          | DV (repeat)                                                                                                                                         | HIC (USA)                     | M                               | M     | X          | ✓           | X           |
| 7                  | 112 Lin (2009)               | DV (reoffending)                                                                                                                                    | HIC (Taiwan)                  | M                               | M     | X          | ✓           | X           |
| 7                  | 119 Maxwell (2004)           | DV (repeat)                                                                                                                                         | HIC (USA)                     | M                               | M     | X          | ✓           | X           |
| 7                  | 122 Miller (2014)            | DV; willingness to intervene in peer DV                                                                                                             | MIC (India)                   | M                               | M     | X          | ✓           | ✓           |
| 4, 7               | 141 Pulerwitz (2006)         | IPV; gender norm attitudes                                                                                                                          | MIC (Brazil)                  | M                               | M     | ✓          | ✓           | ✓           |
| 4, 7               | 142 Pulerwitz (2010)         | IPV; equitable gender norms                                                                                                                         | LIC (Ethiopia)                | M                               | M     | X          | ✓           | ✓           |
| 4, 7               | 143 Pulerwitz (2015)         | GBV; IPV; roles in sexual relationships/gender-equitable norms                                                                                      | LIC (Ethiopia)                | M                               | M     | X          | ✓           | ✓           |
| 7                  | 149 Salazar (2014)           | Sexual violence                                                                                                                                     | HIC (USA)                     | M                               | M     | X          | ✓           | ✓           |
| 7                  | 151 Saunders (1996)          | DV (repeat)                                                                                                                                         | HIC (USA)                     | M                               | M+F   | X          | ✓           | ✓           |
| 7                  | 154 Schwarz (2004)           | Dating violence                                                                                                                                     | HIC (USA)                     | M+F                             | M+F   | X          | X           | ✓           |
| 7                  | 163 Taylor (2001)            | DV (repeat)                                                                                                                                         | HIC (USA)                     | M                               | M     | X          | ✓           | X           |
| 7                  | 164 Taylor (2009)            | DV (recidivism)                                                                                                                                     | HIC (USA)                     | M                               | M     | X          | ✓           | X           |
| 4, 7               | 169 Verma (2008)             | GBV/IPV; partner communication                                                                                                                      | MIC (India)                   | M+F                             | M     | X          | ✓           | ✓           |
| 4, 7               | 171 Wagman (2015)            | Physical/sexual IPV; gender equality                                                                                                                | LIC (Uganda)                  | M+F                             | M+F   | ✓          | ✓           | ✓           |

LIC = Low Income Country, MIC = Middle Income Country, HIC = High Income Country, M = Male, F = Female.

IPV = Intimate Partner Violence, GBV = Gender Based Violence DV = Domestic Violence, STI = Sexually Transmitted Infection.

\*SRHR Domains of the WHO Reproductive Health Strategy:

1. Helping people realise their desired family size
2. Ensuring the health of pregnant women/girls and their new-born infants
3. Preventing unsafe abortion
4. Promoting sexual health and well-being
5. Promoting SRH in disease outbreaks
6. Promoting healthy adolescence for a healthy future
7. Preventing and responding to violence against women/girls
